# Supplementary material for: Sex differences in dendritic spine density and morphology in auditory and visual cortices in adolescence and adulthood
Source: PubMed Central journal article supplement (PMC7287134; doi:10.1038/s41598-020-65942-w), 2020-06-10
Supplement: 41598_2020_65942_MOESM1_ESM.pdf [file 41598_2020_65942_MOESM1_ESM.pdf]

## COVER PAGE – SUPPLEMENTARY INFORMATION

**Title** Sex differences in dendritic spine density and morphology in auditory and visual cortices in adolescence and adulthood

**Authors** Emily M. Parker<sup>1,2,3</sup>, Nathan L. Kindja<sup>2,3</sup>, Claire E.J. Cheetham<sup>1,4,5</sup>, Robert A. Sweet<sup>1,2,3</sup>

**Affiliations** <sup>1</sup>Center for Neuroscience, University of Pittsburgh <sup>2</sup>Translational Neuroscience Program, University of Pittsburgh <sup>3</sup>Department of Psychiatry, University of Pittsburgh <sup>4</sup>Department of Neurobiology, University of Pittsburgh <sup>5</sup>Center for the Neural Basis of Cognition

### Contact Information

|                      |                                                                               |                                                          |
|----------------------|-------------------------------------------------------------------------------|----------------------------------------------------------|
| Emily M. Parker      | Biomedical Science Tower, W1601<br>3811 O'Hara Street<br>Pittsburgh PA, 15213 | <a href="mailto:Emp92@pitt.edu">Emp92@pitt.edu</a>       |
| Nathan L. Kindja     | Biomedical Science Tower, W1601<br>3811 O'Hara Street<br>Pittsburgh PA, 15213 | <a href="mailto:Nlk29@pitt.edu">Nlk29@pitt.edu</a>       |
| Claire E.J. Cheetham | Biomedical Science Tower, E1456<br>3811 O'Hara Street<br>Pittsburgh PA, 15213 | <a href="mailto:Cheetham@pitt.edu">Cheetham@pitt.edu</a> |
| Robert A. Sweet*     | Biomedical Science Tower, W1645<br>3811 O'Hara Street<br>Pittsburgh PA, 15213 | <a href="mailto:Sweetra@upmc.edu">Sweetra@upmc.edu</a>   |

\*Corresponding author

Supplemental Figure 1

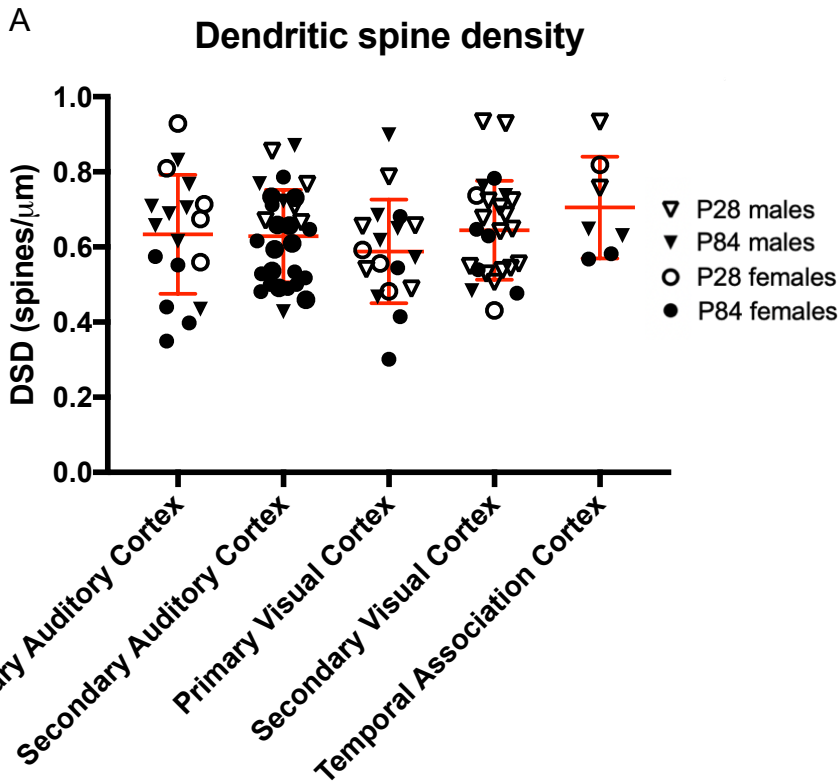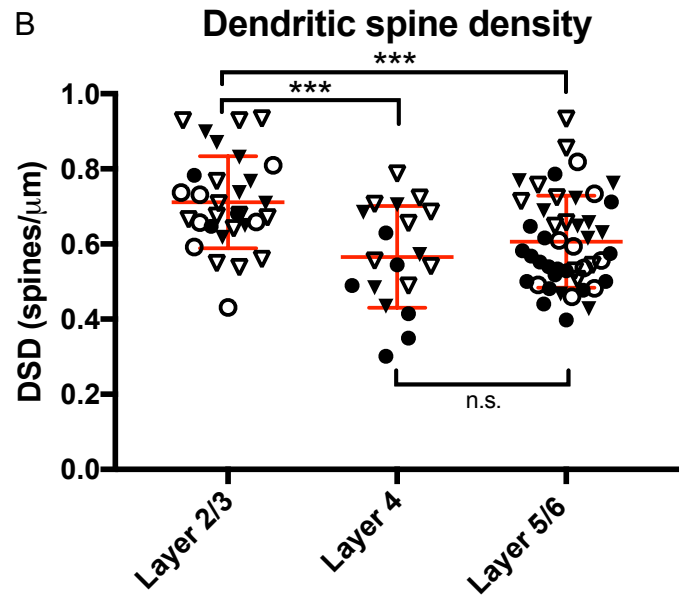

Supplemental Figure 2

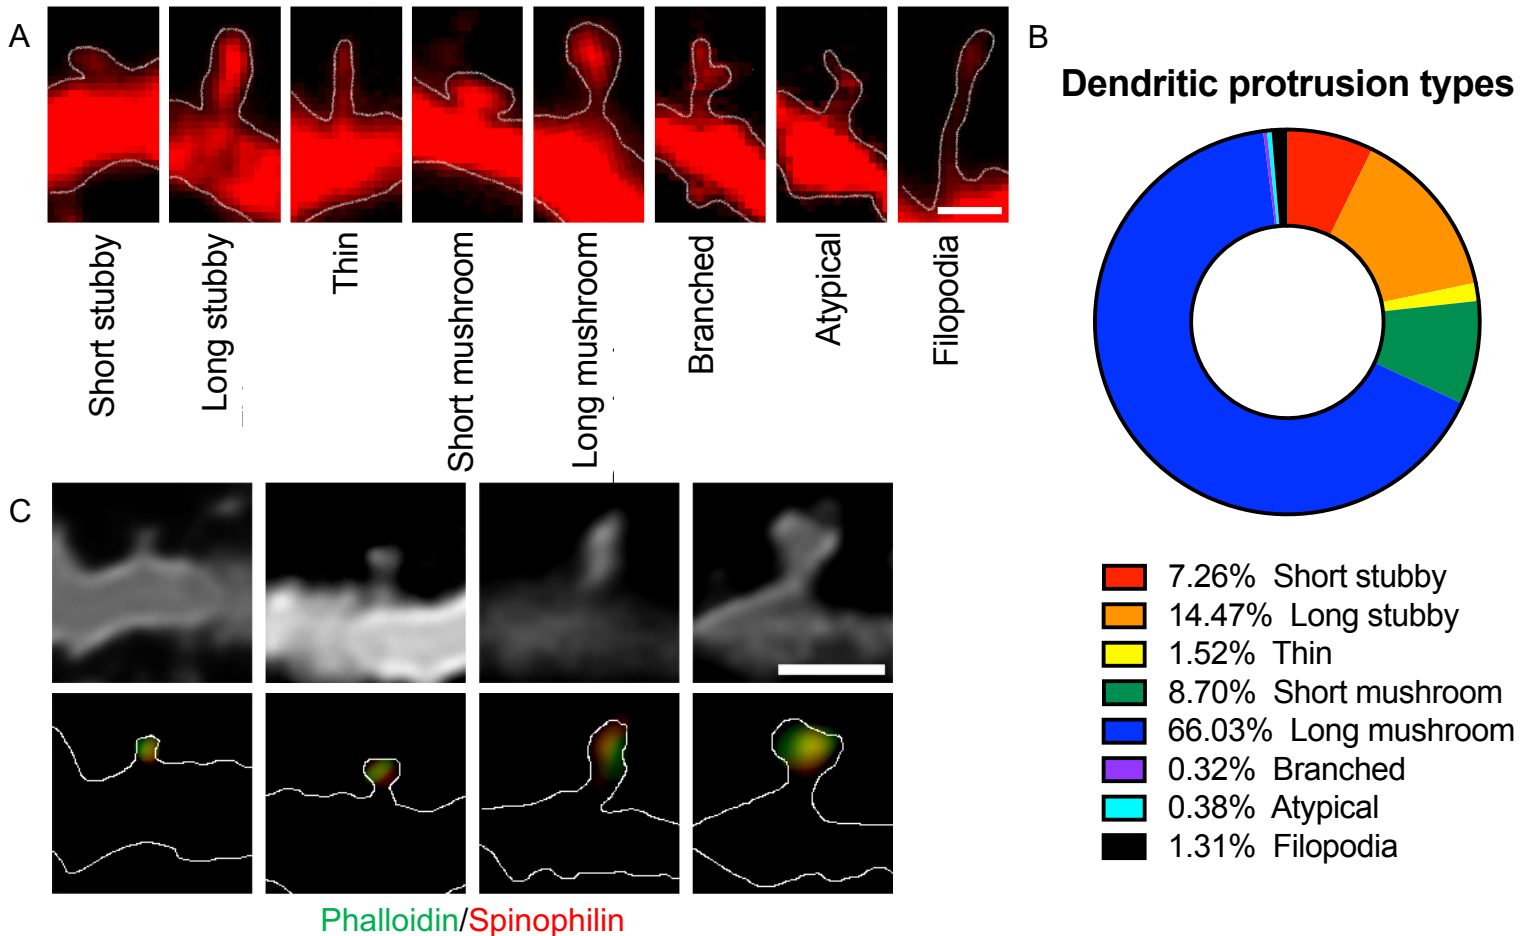

## SUPPLEMENTAL FIGURE CAPTIONS

### Supplemental Figure 1

Regional and laminar DSD. Mean DSD and SD represented by red lines. **A.** DSD is not significantly different across primary auditory, secondary auditory, primary visual, secondary visual and temporal association cortices ( $F=1.829$ ,  $DF=4$ ,  $p=0.131$ ), with no significant region by sex nor region by age interactions. **B.** DSD is significantly increased in L2/3 compared to in L4 ( $p<0.001$ ) and to in L5/6 ( $p<0.001$ ). DSD in L4 and L5/6 are not significantly different ( $p=0.707$ ).

### Supplemental Figure 2

Dendritic protrusions. **A.** Depictions of each dendritic protrusion type. Scalebar =  $1\mu\text{m}$ . **B.** All dendritic protrusions ( $n = 6241$ ) were classified into 1 of the 8 morphological types shown in A. **C.** GFP filled dendrite (shown in white) from pyramidal cell in mouse cortex. Immunohistochemical strategy used in our previously published study [49], which utilized phalloidin and spinophilin co-localization to identify putative spine objects, identifies GFP-filled spines in the tissue used in the current study. Scalebar =  $1\mu\text{m}$ .
